# Supplementary material for: Fronto-Central Theta Oscillations Are Related to Oscillations in Saccadic Response Times (SRT): An EEG and Behavioral Data Analysis
Source: PubMed Central journal article supplement (PMC4236144; doi:10.1371/journal.pone.0112974), 2014-11-18
Supplement: pone.0112974.s009.pdf [file pone.0112974.s009.pdf]

| Type of error              | Participant |     |     |
|----------------------------|-------------|-----|-----|
|                            | 1           | 2   | 3   |
| Saccades before any signal | 0.0         | 0.0 | 0.0 |
| Amplitude not within 3 std | 0.0         | 0.9 | 0.7 |
| SRT < 80                   | 0.9         | 0.3 | 0.5 |
| SRT > 500                  | 0.0         | 0.0 | 0.0 |
| Directional                | 1.1         | 0.2 | 0.5 |
| Total                      | 2.0         | 1.4 | 1.7 |
