# Supplementary material for: Fronto-Central Theta Oscillations Are Related to Oscillations in Saccadic Response Times (SRT): An EEG and Behavioral Data Analysis
Source: PubMed Central journal article supplement (PMC4236144; doi:10.1371/journal.pone.0112974), 2014-11-18
Supplement: pone.0112974.s010.pdf [file pone.0112974.s010.pdf]

| Participant            | 1    |        | 2    |        | 3    |        |
|------------------------|------|--------|------|--------|------|--------|
| Presentation condition | ipsi | contra | ipsi | contra | ipsi | contra |
| Degree of polynomial   |      |        |      |        |      |        |
| 2                      | 7    | 3      | 7    | 6      | 4    | 4      |
| 5                      | 7    | 11     | 6    | 7      | 10   | 7      |

Frequencies with maximum power after detrending the median data series with polynomials of two different degrees.
