# Supplementary material for: Fronto-Central Theta Oscillations Are Related to Oscillations in Saccadic Response Times (SRT): An EEG and Behavioral Data Analysis
Source: PubMed Central journal article supplement (PMC4236144; doi:10.1371/journal.pone.0112974), 2014-11-18
Supplement: pone.0112974.s011.pdf [file pone.0112974.s011.pdf]

### **Detrending with different degree polynomials**

Figure S1 A shows the zeromean difference when detrending the curve of the mean RT with effect of oscillatory activity shown in Figure 2 with a *2<sup>nd</sup>* degree polynomial. The black dashed lines have equal distance to the zero line. A trend is still recognizable in the oscillation. Figure S1 B shows the zeromean difference when detrending the same curve with a *5<sup>th</sup>* degree polynomial which appears to be more symmetric around the zeromean.
